# Supplementary material for: Evaluation of the Long-Lasting Flavour Perception after the Consumption of Wines Treated with Different Types of Oenological Additives Considering Individual 6-n-Propylthiouracil Taster Status
Source: MDPI journal article supplement (doi:10.3390/foods12152835), 2023-07-26
Supplement: s1 [file s1]

Supplementary Materials

# Evaluation of the Long-Lasting Flavour Perception after the Consumption of Wines Treated with Different Types of Oenological Additives Considering Individual 6-n-Propylthiouracil Taster Status

Rafael I. Velázquez-Martínez <sup>1</sup>, Celia Criado <sup>1</sup>, Carolina Muñoz-González <sup>1</sup>, Julia Crespo <sup>2</sup> and María Ángeles Pozo-Bayón <sup>1,\*</sup>

<sup>1</sup> Instituto de Investigación en Ciencias de la Alimentación, CSIC-UAM, Nicolás Cabrera 9, 28049 Madrid, Spain; rafael.v.m@csic.es (R.I.V.-M.); celia.criado@csic.es (C.C.); c.munoz@csic.es (C.M.-G.)

<sup>2</sup> Departamento de Investigación Agroambiental, Instituto Madrileño de Investigación y Desarrollo Rural, Agrario y Alimentario (IMIDRA), El Encín, A-2km 38.2, 28805 Alcalá de Henares, Spain; julia.crespo.garcia@madrid.org

\* Correspondence: m.delpozo@csic.es; Tel.: +34-910-017-961

**Table S1.** Chemical compositions of the control wines without oenological additives (average values).

| Wine  | Grape Varieties | Tartaric Acid (g/L) | Malic Acid (g/L) | Lactic Acid (g/L) | Glucose/ Fructose (g/L) | Ca (mg/L) | K (mg/L) | SO <sub>2</sub> L (g/L) | SO <sub>2</sub> T (g/L) | Ethanol (%V/V) | Titrateable Acidity (g/L) | Volatile acid (g/L) | pH   |
|-------|-----------------|---------------------|------------------|-------------------|-------------------------|-----------|----------|-------------------------|-------------------------|----------------|---------------------------|---------------------|------|
| Red   | Tempranillo     | 2.85                | 0.03             | 0.62              | 0.15                    | 58.23     | 945.5    | 56                      | 68                      | 13.9           | 5.07                      | 0.21                | 3.56 |
| White | Malvar          | 3.47                | 0.53             |                   | 0.37                    | 74        | 378.5    | 28                      | 72                      | 13.8           | 5.48                      | 0.45                | 3.10 |

**Table S2.** Chemical compositions of the oenological additives used in this study.

| Oenological Additive | Polysaccharide (% Mass) | Protein (% mass) | Total Polyphenols (GAE mg/L) |
|----------------------|-------------------------|------------------|------------------------------|
| Gallotannin          | --                      | --               | 1.4                          |
| Ellagitannin         | --                      | --               | 1.36                         |
| Mannoprotein         | 65                      | 3.05             | --                           |

Polysaccharides were determined by using the phenol sulfuric method. Protein determination was carried out using the Kjeldahl method. The concentration of total polyphenols was calculated using the Folin–Ciocalteu method (in mg/L gallic acid equivalents).
